# Supplementary material
Source: Springer Nature journal article supplement (https://www.springermedizin.de/resource/supplementary/12998_2009_134_MOESM1_ESM.pdf/9623632)
Supplement: MOESM1 [file 9623632]

## Initial consultation / new injury questionnaire

**Player name:** \_\_\_\_\_ **Sex:**  Male  Female **Age:** \_\_\_\_\_

**Diagnosis of condition / reason for this consultation:** \_\_\_\_\_

**Injury type:** (please ✓ one box)

- Bone  Joint  Muscle  Tendon  Contusion  Laceration  
 Central/peripheral nervous system  Other: \_\_\_\_\_

**Reason for Presentation** (please ✓ one box)

- New injury – player has not previously had this type of injury  
 Aggravation or exacerbation of a current existing injury that had not fully resolved  
 Recurrence of a previous injury that had that had fully resolved (i.e. was pain free)  
 Maintenance / preventative / asymptomatic care  
 Illness  
 Other \_\_\_\_\_

**How long has the player had this condition or pain for:** (please ✓ one box)

- 0-7 days  1-4 wks  1-3 mths  3-6 mths  6-12 mths  1-2 yrs  2+ yrs

**Please rate the degree of pain the player has for this condition:** (circle one number)

No pain 0    1    2    3    4    5    6    7    8    9    10 Worst possible pain

**Mechanism of injury:** how did the injury occur? (please ✓ one box)

- Contact / physical collision with another player or object. Specify \_\_\_\_\_  
 Non-contact / DID NOT involve physical contact. Specify \_\_\_\_\_  
 Uncertain / the injury gradually developed. Specify \_\_\_\_\_

**Type of activity at time of injury** (please ✓ one box)

- Competition. Specify period of game:  First  Second  Third  
 Training/practice  
 Other \_\_\_\_\_

**If applicable, did the player have to stop playing or training because of injury?**

- Yes  No

**If no, was the player restricted or limited from full participation?**  Yes  No

**What other practitioners has the player previously consulted for this condition:**

(please ✓)

- None  Medical doctor  Physiotherapist  Massage therapist / Myotherapist  
 Chiropractor  Osteopath  Other: \_\_\_\_\_

**Was referral for advanced imaging required?** (please ✓)

- No  Yes. Specify:  x-ray  CT/MRI  Ultrasound  Other \_\_\_\_\_

**Was referral to another health care provider required?** (please ✓)

- No  Yes. Specify  Medical doctor  Ambulance  Hospital  Physio  
 Other: \_\_\_\_\_

**If applicable, was this provided at the event?** (please ✓)

- No  Yes
